# Supplementary material for: Effect of Drying Technique on the Volatile Content of Ecuadorian Bulk and Fine-Flavor Cocoa
Source: MDPI journal article supplement (doi:10.3390/foods12051065), 2023-03-02
Supplement: s1 [file s1]

# Effect of drying technique on the volatile content of Ecuadorian bulk and fine-flavor cocoa

Cynthia Yadira Erazo Solorzano <sup>1</sup>, Vincenzo Disca <sup>2</sup>, JoséManuel Muñoz-Redondo <sup>3</sup>, Diego Armando Tuárez García <sup>1</sup>, Mónica Sánchez-Parra <sup>3</sup>, Manuel Danilo Carrilo Zenteno <sup>4</sup>, José Manuel Moreno-Rojas <sup>3,5\*</sup> and Raquel Rodríguez-Solana <sup>3,6\*</sup>

<sup>1</sup> Faculty of Industry and Production Sciences, State Technical University of Quevedo, Av. Walter Andrade, km 1.5 via Santo Domingo, C.P. 73, Quevedo 120301, Ecuador

<sup>2</sup> Dipartimento di Scienze del Farmaco, Università degli Studi del Piemonte Orientale "A. Avogadro", 28100 Novara, Italy

<sup>3</sup> Department of Agrifood Industry and Food Quality, Andalusian Institute of Agricultural and Fisheries Research and Training (IFAPA), Alameda del Obispo, Avda Menéndez Pidal s/n, 14004 Córdoba, Spain

<sup>4</sup> Instituto Nacional de Investigaciones Agropecuarias (INIAP), Estación Experimental Tropical Pichilingue (EETP), Departamento de Manejo de Suelos y Aguas (DMSA), km 5 vía Quevedo – El Empalme, Cantón Mocache, Quevedo 120313, Ecuador;

<sup>5</sup> Foods for Health Group, Instituto Maimónides de Investigación Biomédica de Córdoba (IMIBIC), 14004 Córdoba, Spain.

<sup>6</sup> MED–Mediterranean Institute for Agriculture, Environment and Development & CHANGE–Global Change and Sustainability Institute, Faculdade de Ciências e Tecnologia, Universidade do Algarve, Campus de Gambelas, 8005-139 Faro, Portugal

\* Correspondence: josem.moreno.rojas@juntadeandalucia.es (J.M.M.-R.); raquel.rodriguez.solana@juntadeandalucia.es (R.R.-S.)

## Supplementary information

**Table S1.** Volatile compounds identified in fresh, and oven-dried (OD), sun-dried (SD) or sun-dried using a black plastic sheeting (SBPD) bulk (foratero (F) and CCN51 (C)) and fine-flavor (ETT103 (E) and LR14 (L)) cocoa, with the corresponding retention times (min), retention indexes (experimental and theoretical (NIST)) and ions of quantification.

|           |          | Fresh cocoa                              |                            |                    |      |   |   |   |   | OD |   |   |   | SD |   |   |   | SBPD |   |   |   |
|-----------|----------|------------------------------------------|----------------------------|--------------------|------|---|---|---|---|----|---|---|---|----|---|---|---|------|---|---|---|
|           | RT (min) | Compound                                 | RI <sub>experimental</sub> | RI <sub>NIST</sub> | IonQ | F | C | E | L | F  | C | E | L | F  | C | E | L | F    | C | E | L |
| Aldehydes |          |                                          |                            |                    |      |   |   |   |   |    |   |   |   |    |   |   |   |      |   |   |   |
| 1         | 4.42     | 2-Methyl butanal                         | 920                        | 922                | 57   | x | x | x | x | x  | x | x | x | x  | x | x | x | x    | x | x | x |
| 2         | 7.79     | Hexanal                                  | 1087                       | 1086               | 56   | x | x | x | x |    |   |   |   |    |   |   |   |      |   |   |   |
| 3         | 13.99    | (E)-2-Octenal                            | 1443                       | 1443               | 70   | x |   | x | x |    |   |   |   |    |   |   |   |      |   |   |   |
| 4         | 14.38    | 3-(Methylthio)propanal                   | 1471                       | 1471               | 104  | x | x | x |   |    |   |   |   |    |   |   |   |      |   | x |   |
| 5         | 14.54    | Furfural                                 | 1483                       | 1483               | 96   |   |   |   |   |    |   | x | x |    |   |   |   |      |   |   |   |
| 6         | 15.36    | Benzaldehyde                             | 1545                       | 1545               | 77   | x | x | x | x | x  | x | x | x | x  | x | x | x | x    | x | x | x |
| 7         | 16.84    | Benzacetaldehyde                         | 1664                       | 1663               | 91   | x | x | x | x | x  | x | x | x | x  | x | x | x | x    | x | x | x |
| 8         | 20.07    | α-Ethylidenbenzeneacetaldehyde           | 1955                       | 1961               | 117  | x | x | x | x | x  | x | x | x | x  | x | x | x | x    | x | x | x |
| Alcohols  |          |                                          |                            |                    |      |   |   |   |   |    |   |   |   |    |   |   |   |      |   |   |   |
| 9         | 7.12     | 2-Methylbut-3-en-2-ol                    | 1056                       | 1058               | 71   | x | x | x | x |    |   |   |   |    |   |   |   |      |   |   |   |
| 10        | 8.2      | 2-Methyl-propanol                        | 1106                       | 1105               | 74   |   |   |   |   |    |   |   |   |    |   |   | x |      |   |   |   |
| 11        | 8.72     | 3-Methyl-2-butanol +                     | 1131                       | 1124               | 73   |   |   |   |   |    |   |   |   |    |   |   |   |      |   |   |   |
| 12        |          | 2-pentanol                               | 1131                       | 1130               | 73   | x | x | x | x | x  | x | x | x | x  | x | x | x | x    | x | x | x |
| 13        | 10.35    | 3-Methyl-butanol                         | 1213                       | 1213               | 55   | x | x | x | x | x  | x | x | x | x  | x | x | x | x    | x | x | x |
| 14        | 10.57    | 2-Hexanol                                | 1226                       | 1226               | 69   | x | x | x | x |    |   |   |   |    |   |   |   |      |   |   |   |
| 15        | 10.63    | 2-Methyl-butanol                         | 1229                       | 1224               | 57   |   | x |   |   | x  | x | x | x | x  | x | x | x | x    | x | x | x |
| 16        | 11.09    | 1-Pentanol                               | 1255                       | 1255               | 55   | x | x | x | x |    |   |   |   |    |   |   |   |      |   |   |   |
| 17        | 12.24    | 2-Heptanol                               | 1324                       | 1324               | 55   | x | x | x | x | x  | x | x | x | x  | x | x | x | x    | x | x | x |
| 18        | 12.6     | 4-Methyl-5-hexen-2-ol (probably)         | 1347                       | 1344*/1348**       | 81   | x | x | x | x | x  | x | x | x | x  | x | x | x | x    | x | x | x |
| 19        | 12.79    | 1-Hexanol                                | 1360                       | 1360               | 56   | x | x | x |   | x  |   | x |   |    |   |   | x |      |   |   | x |
| 20        | 13.71    | 2-Octanol                                | 1422                       | 1422               | 55   | x | x | x | x |    | x |   | x | x  | x | x | x |      |   | x | x |
| 21        | 15.07    | 2-Nonanol                                | 1522                       | 1521               | 69   | x | x | x | x | x  | x | x | x | x  | x | x | x | x    | x |   | x |
| 22        | 15.38    | 2,3-Butanediol                           | 1547                       | 1544               | 57   |   |   |   |   |    |   |   | x | x  | x | x |   |      |   |   |   |
| 23        | 18.69    | α-Phenylethanol                          | 1826                       | 1827               | 79   | x | x | x | x | x  | x | x | x | x  | x | x | x | x    | x | x | x |
| 24        | 19.41    | Benzyl alcohol                           | 1893                       | 1893               | 79   | x | x | x | x | x  | x | x | x | x  | x | x | x | x    | x | x | x |
| 25        | 19.8     | Phenylethyl alcohol<br>(2-Phenylethanol) | 1930                       | 1929               | 91   | x | x | x | x | x  | x | x | x | x  | x | x | x | x    | x | x | x |
| Acids     |          |                                          |                            |                    |      |   |   |   |   |    |   |   |   |    |   |   |   |      |   |   |   |
| 26        | 14.24    | Acetic acid                              | 1461                       | 1460               | 60   |   |   |   |   | x  | x | x | x | x  | x | x | x | x    | x | x | x |
| 27        | 15.54    | Propanoic acid                           | 1556                       | 1556               | 74   |   |   |   |   | x  | x | x | x | x  | x | x | x | x    | x | x | x |
| 28        | 15.79    | 2-Methyl-propanoic acid                  | 1578                       | 1578               | 73   |   |   |   |   | x  | x | x | x | x  | x | x | x | x    | x | x | x |
| 29        | 16.58    | Butanoic_acid                            | 1643                       | 1642               | 60   |   |   |   |   | x  |   | x |   |    |   |   |   |      |   | x | x |
| 30        | 17.23    | 2-/3-Methyl-butanoic acid                | 1685                       | 1687/1685          | 74   |   |   |   |   | x  | x | x | x | x  | x | x | x | x    | x | x | x |

|               |       |                                                       |                            |                    |      | Fresh cocoa |   |   |   | OD |   |   |   | SD |   |   |   | SBPD |   |   |   |
|---------------|-------|-------------------------------------------------------|----------------------------|--------------------|------|-------------|---|---|---|----|---|---|---|----|---|---|---|------|---|---|---|
| RT (min)      |       | Compound                                              | RI <sub>experimental</sub> | RI <sub>NIST</sub> | IonQ | F           | C | E | L | F  | C | E | L | F  | C | E | L | F    | C | E | L |
| Ketones       |       |                                                       |                            |                    |      |             |   |   |   |    |   |   |   |    |   |   |   |      |   |   |   |
| 31            | 5.62  | 2-Pentanone                                           | 986                        | 985                | 86   | x           | x | x | x | x  | x |   |   |    |   |   |   | x    | x |   |   |
| 32            | 9.99  | 2-Heptanone +                                         | 1188                       | 1188               | 58   | x           | x | x | x | x  | x | x | x | x  | x | x | x | x    | x | x | x |
| 33            |       | 5-methyl-2-hexanone                                   | 1188                       | 1188               |      |             |   |   |   |    |   |   |   |    |   |   |   |      |   |   |   |
| 34            | 11.7  | 2-Octanone                                            | 1290                       | 1290               | 58   | x           | x | x | x | x  | x | x | x | x  | x | x | x | x    |   | x | x |
| 35            | 11.78 | 3-Hydroxy-2-butanone (acetoin)                        | 1295                       | 1295               | 88   |             |   |   |   | x  | x | x | x | x  | x | x | x | x    | x | x | x |
| 36            | 12.97 | 2-Hydroxy-3-pentanone                                 | 1372                       | 1370               | 57   |             |   |   |   | x  | x |   | x | x  | x |   | x | x    | x |   | x |
| 37            | 13.23 | 2-Nonanone                                            | 1389                       | 1389               | 58   | x           | x | x | x | x  | x | x | x | x  | x | x | x | x    | x | x | x |
| 38            | 16    | 3,6-Heptanedione (probably)                           | 1595                       | 1592***            | 57   | x           | x | x | x | x  |   |   | x | x  |   |   | x |      |   |   | x |
| 39            | 16.96 | Acetophenone                                          | 1674                       | 1671               | 105  | x           | x | x | x | x  | x | x | x | x  | x | x | x | x    | x | x | x |
| Esters        |       |                                                       |                            |                    |      |             |   |   |   |    |   |   |   |    |   |   |   |      |   |   |   |
| 40            | 4.14  | Ethyl acetate                                         | 904                        | 904                | 61   |             |   |   |   |    | x | x | x | x  | x | x | x | x    | x | x | x |
| 41            | 7.6   | 2-Pentyl acetate                                      | 1078                       | 1074               | 87   |             |   |   |   | x  |   |   |   | x  | x |   | x | x    | x |   |   |
| 42            | 8.6   | 2-/3-Methylbutyl acetate                              | 1125                       | 1126               | 70   |             |   |   |   | x  | x | x | x | x  | x | x | x | x    | x | x | x |
| 43            | 10.9  | Ethyl hexanoate                                       | 1245                       | 1245               | 88   |             |   |   |   | x  | x | x | x | x  | x | x | x | x    | x | x | x |
| 44            | 11.3  | 1-Methylhexyl acetate<br>(2-heptanol acetate)         | 1273                       | 1266               | 98   |             |   |   |   | x  | x | x | x | x  | x | x | x | x    | x | x | x |
| 45            | 13.99 | Ethyl octanoate                                       | 1443                       | 1445               | 88   |             |   |   |   | x  | x | x | x | x  | x | x | x | x    | x | x | x |
| 46            | 14.83 | 2,3-Butanedioldiacetate                               | 1504                       | 1501               | 87   |             |   |   |   | x  | x |   | x |    |   |   |   | x    |   |   |   |
| 47            | 17.81 | Benzyl acetate                                        | 1747                       | 1747               | 108  |             |   |   |   | x  | x | x | x | x  | x |   | x | x    | x | x | x |
| 48            | 18.43 | Ethyl benzeneacetate                                  | 1802                       | 1800               | 91   |             |   |   |   | x  | x | x | x | x  | x | x | x | x    | x | x | x |
| 49            | 18.77 | β-Phenylethyl acetate                                 | 1833                       | 1833               | 104  |             |   |   |   | x  | x | x | x | x  | x | x | x | x    | x | x | x |
| 50            | 18.78 | Phenethyl pivalate                                    | 1833                       | 1832               | 57   |             |   |   |   |    | x | x |   | x  | x | x |   |      | x |   |   |
| 51            | 19.03 | Butyl benzoate                                        | 1857                       | 1856               | 105  | x           | x | x | x | x  | x | x | x | x  | x | x | x | x    | x | x | x |
| Terpenes      |       |                                                       |                            |                    |      |             |   |   |   |    |   |   |   |    |   |   |   |      |   |   |   |
| 52            | 9.32  | β-Myrcene                                             | 1161                       | 1161               | 93   | x           |   | x | x | x  | x | x | x | x  | x | x | x |      | x | x | x |
| 53            | 10.16 | D-Limonene                                            | 1202                       | 1202               | 68   | x           |   |   |   |    |   |   | x | x  |   | x | x |      |   |   |   |
| 54            | 10.78 | Ocimene (isomers E and Z)                             | 1236                       | 1237               | 93   | x           |   | x | x |    | x | x | x |    |   | x | x |      |   | x | x |
| 55            | 13.13 | γ-Pyrone (1,3,5,5-tetramethyl-<br>1,3-cyclohexadiene) | 1382                       | 1406               | 121  | x           |   | x | x |    |   | x | x |    |   | x | x |      |   |   | x |
| 56            | 14.09 | Linalool oxide I                                      | 1450                       | 1450               | 94   | x           | x | x | x | x  | x | x | x | x  | x | x | x |      | x | x | x |
| 57            | 14.49 | Linalool oxide II                                     | 1478                       | 1478               | 94   | x           | x | x | x | x  | x | x | x | x  | x | x | x | x    | x | x | x |
| 58            | 15.45 | Linalool                                              | 1552                       | 1552               | 71   | x           | x | x | x | x  | x | x | x | x  | x | x | x | x    | x | x | x |
| Lactones      |       |                                                       |                            |                    |      |             |   |   |   |    |   |   |   |    |   |   |   |      |   |   |   |
| 59            | 16.49 | Valerolactone                                         | 1635                       | 1629               | 56   |             |   |   |   |    | x | x | x |    |   | x |   |      |   | x | x |
| 60            | 16.74 | Butyrolactone                                         | 1656                       | 1652               | 86   |             |   |   |   | x  | x | x | x | x  | x | x | x | x    | x | x | x |
| Miscellaneous |       |                                                       |                            |                    |      |             |   |   |   |    |   |   |   |    |   |   |   |      |   |   |   |
| 61            | 13.59 | trimethyl-Pyrazine                                    | 1414                       | 1414               | 122  |             |   |   |   | x  | x | x | x | x  |   |   | x | x    |   |   | x |
| 62            | 16.29 | Isophorone                                            | 1618                       | 1615               | 138  |             |   |   |   | x  |   | x |   |    |   |   |   |      |   |   | x |
| 63            | 16.42 | Benzonitrile                                          | 1629                       | 1629               | 103  |             |   |   |   | x  |   | x |   |    |   | x |   |      |   | x |   |
| 64            | 19.28 | o-Guaiacol                                            | 1881                       | 1886               | 109  |             |   |   |   | x  |   |   |   |    |   |   |   | x    |   |   |   |

Compounds tentative identified according to the linear retention index (RI) calculated in previous works: 4-methyl-5-hexen-2-ol, \*Costa Castro Alves et al. [21] and \*\*Li [22]; 3,6-Heptanedione, \*\*\*Raffo et al. [23]. RI: retention index; Ion Q: ion of quantification.
